# Supplementary material for: The device performance limit of in-plane monolayer VTe2/WTe2 heterojunction-based field-effect transistors
Source: Royal Society of Chemistry journal article supplement (doi:10.1039/d3nr03974a), 2023-01-01
Supplement: d3nr03974a1.pdf [file d3nr03974a1.pdf]

## Supplemental Material for “Device Performance Limit of In-Plane Monolayer VTe<sub>2</sub>/WTe<sub>2</sub> Heterojunction-Based Field-Effect Transistors”

Xingyi Tan<sup>1,2</sup>, Qiang Li<sup>2</sup>, Dahua Ren<sup>2</sup>, and Hua-Hua Fu<sup>3,\*</sup>

<sup>1</sup>Department of Physics, Chongqing Three Gorges University, Wanzhou, 404100, China

<sup>2</sup>College of Intelligent systems science and engineering, Hubei Minzu University, Enshi,  
445000, China

<sup>3</sup>School of Physics and Wuhan National High Magnetic Field Center, Huazhong University of  
Science and Technology, Wuhan 430074, China

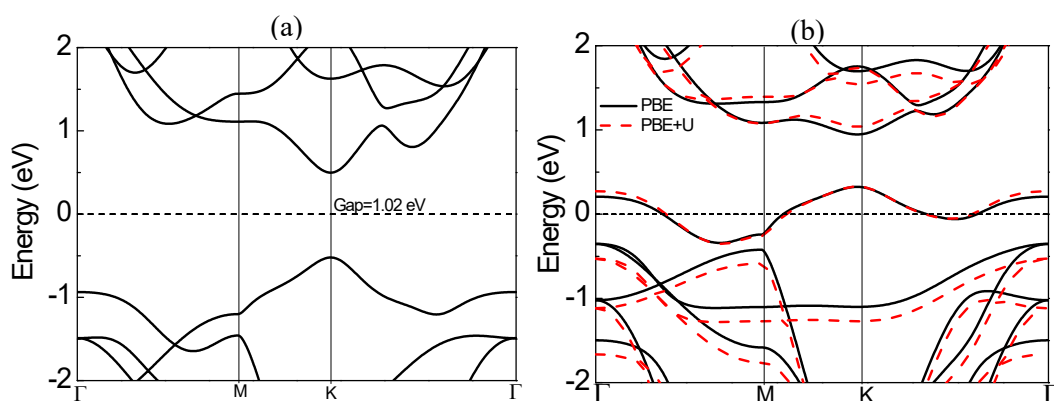

Fig. S1. (a) Band structure of monolayer WTe<sub>2</sub>. (b) Band structure of monolayer VTe<sub>2</sub> by using usual PBE and PBE+U. The band structures of VTe<sub>2</sub> are only a little different using PBE and PBE+U. The value of U are fixed as 2 eV for V [Sci. Rep. 6, 32625 (2016); Phys. Rev. B 50, 16861 (1994)]. Therefore, we use PBE in this work.

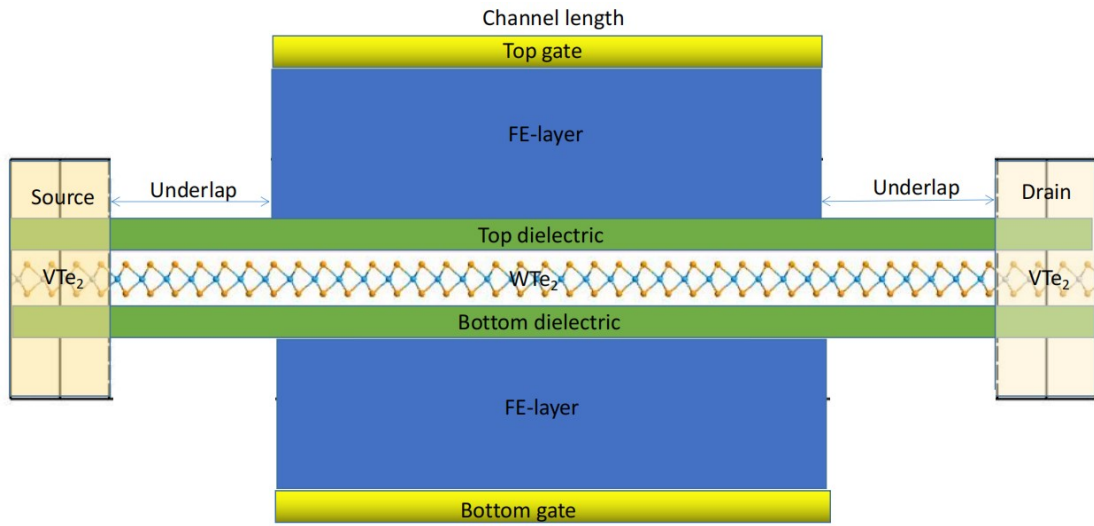

**Fig. S2.** Schematic view of the DG-cold-source VTe<sub>2</sub>/WTe<sub>2</sub>-based FET devices covered by ferroelectric layers on the top and bottom gate regions.

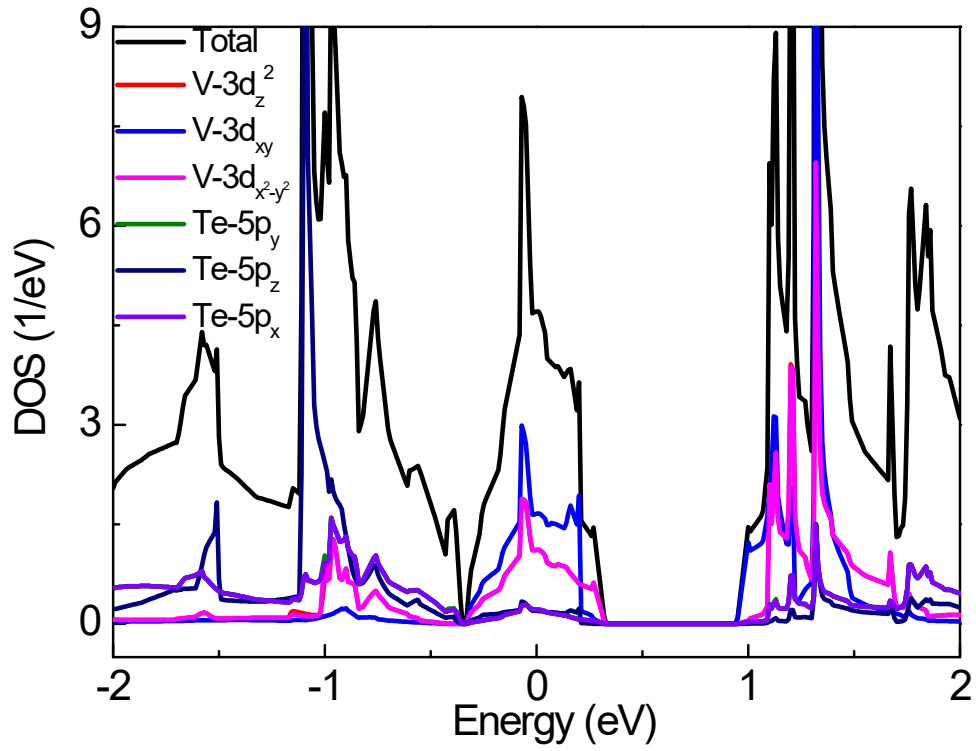

**Fig. S3.** The total DOS and the projected DOS of monolayer VTe<sub>2</sub>. The numerical results show that the total DOSs are formed by V-3d<sub>z</sub><sup>2</sup>, V-3d<sub>xy</sub>, V-3d<sub>x<sup>2</sup>-y<sup>2</sup></sub>, Te-5p<sub>x</sub>, Te-5p<sub>y</sub>, Te-5p<sub>z</sub> orbitals.

**Table S1.** The basic key parameters of the DG-cold-source VTe<sub>2</sub>/WTe<sub>2</sub>-based FET devices with a 5-nm  $L_g$  versus the criteria required by the 2028 needs of the ITRS 2013 for the high-performance and low-power-dissipation applications.

|                    | $L_g$<br>(nm) | $U_L$<br>(nm) | SS<br>(mV/de<br>c) | $I_{off}$<br>( $\mu$ A/ $\mu$ m) | $I_{on}$ ( $\mu$ A/ $\mu$ m) | $I_{on}/I_{off}$   | $C_t$<br>(fF/ $\mu$<br>m) | $\tau$ (ps) | PDP<br>(fJ/ $\mu$ m) |      |
|--------------------|---------------|---------------|--------------------|----------------------------------|------------------------------|--------------------|---------------------------|-------------|----------------------|------|
| HP                 | 5             | 0             | 141                | 0.1                              | 1038.63                      | $1.04 \times 10^4$ | 0.22                      | 0.41        | 0.27                 |      |
|                    |               | 1             | 81                 | 0.1                              | 2573.05                      | $2.57 \times 10^4$ | 0.19                      | 0.14        | 0.24                 |      |
|                    |               | 2             | 63                 | 0.1                              | 1725.78                      | $1.73 \times 10^4$ | 0.13                      | 0.14        | 0.16                 |      |
|                    |               | 3             | 55                 | 0.1                              | 1149.72                      | $1.15 \times 10^4$ | 0.10                      | 0.17        | 0.12                 |      |
|                    | 3             | 0             | 323                | 0.1                              | -                            | -                  | -                         | -           | -                    |      |
|                    |               | 1             | 168                | 0.1                              | 100.13                       | $1.00 \times 10^3$ | -                         | -           | -                    |      |
|                    |               | 2             | 99                 | 0.1                              | 1329.90                      | $1.33 \times 10^4$ | 0.08                      | 0.12        | 0.10                 |      |
|                    |               | 3             | 76                 | 0.1                              | 986.60                       | $9.87 \times 10^3$ | 0.07                      | 0.13        | 0.08                 |      |
|                    | 1             | 1             | 617                | 0.1                              | -                            | -                  | -                         | -           | -                    |      |
|                    |               | 2             | 239                | 0.1                              | -                            | -                  | -                         | -           | -                    |      |
|                    |               | 3(o-NC)       | 147                | 0.1                              | 456.65                       | $4.57 \times 10^3$ | 0.03                      | 0.12        | 0.03                 |      |
|                    |               | 3(w-NC)       | 118                | 0.1                              | 1035.98                      | $1.04 \times 10^4$ | 0.04                      | 0.07        | 0.04                 |      |
|                    | LP            | 5             | 0                  | 141                              | $5 \times 10^{-5}$           | -                  | -                         | -           | -                    | -    |
|                    |               |               | 1                  | 81                               | $5 \times 10^{-5}$           | -                  | -                         | -           | -                    | -    |
|                    |               |               | 2                  | 63                               | $5 \times 10^{-5}$           | 434.17             | $8.68 \times 10^6$        | 0.10        | 0.45                 | 0.13 |
|                    |               |               | 3                  | 55                               | $5 \times 10^{-5}$           | 578.42             | $1.16 \times 10^7$        | 0.07        | 0.25                 | 0.09 |
| 3                  |               | 0             | 323                | $5 \times 10^{-5}$               | -                            | -                  | -                         | -           | -                    |      |
|                    |               | 1             | 168                | $5 \times 10^{-5}$               | -                            | -                  | -                         | -           | -                    |      |
|                    |               | 2             | 99                 | $5 \times 10^{-5}$               | -                            | -                  | -                         | -           | -                    |      |
|                    |               | 3             | 76                 | $5 \times 10^{-5}$               | 0.14                         | $1.40 \times 10^4$ | -                         | -           | -                    |      |
| 1                  |               | 1             | 617                | $5 \times 10^{-5}$               | -                            | -                  | -                         | -           | -                    |      |
|                    |               | 2             | 239                | $5 \times 10^{-5}$               | -                            | -                  | -                         | -           | -                    |      |
| 3                  | 1             | 147           | $5 \times 10^{-5}$ | -                                | -                            | -                  | -                         | -           |                      |      |
|                    | 3             | 118           | $5 \times 10^{-5}$ | -                                | -                            | -                  | -                         | -           |                      |      |
| ITRS<br>HP<br>2028 | 5.1           | -             | -                  | 0.1                              | 900                          | $9.00 \times 10^3$ | 0.6                       | 0.423       | 0.24                 |      |
| ITRS<br>LP<br>2028 | 5.9           | -             | -                  | $5 \times 10^{-5}$               | 295                          | $5.90 \times 10^6$ | 0.69                      | 1.493       | 0.28                 |      |

$L_g$ : the gate length.  $U_L$ : the underlap length. SS: the subthreshold swing.  $I_{off}$ : the off-state current.  $I_{on}$ : the on-state current.  $C_g$ : the gate capacitance.  $\tau$ : the delay time. PDP: the power dissipation.
